# Supplementary material
Source: publisher figshare collection journal article supplement (https://frontiersin.figshare.com/ndownloader/files/33933101)
Supplement: Supplementary file [file 33933101]

## *Supplementary Materials*

### **1 Factors associated with PTN group: univariate analyses**

#### *Statistical analysis*

Low and good PTN groups were compared on socio-demographic variables (age, sex, bachelor's degree) and addiction related factors (addiction criteria, main addiction, current use, duration of regular use, current use problems, population, current poly-addiction), using Wilcoxon ( $z$ ) and  $\chi^2$  of Pearson tests ( $\chi^2$ ),  $p$ -value set at 0.0009 after Bonferroni correction (Supplementary Table 1).

### **2 PTN – craving association by main addiction**

#### *Statistical analysis*

Wilcoxon tests examined the association between craving variables (frequency, mean and maximal intensities) and PTN level (independent variable) for each main addiction,  $p$ -value set at 0.0009 after Bonferroni correction (Supplementary Table 2).

**Supplementary Table 1.** Demographic and substance-related characteristics in the Low PTN and Good PTN groups ( $n=663$ ).

|                                                             | Mean ( <i>SD</i> ) or percentage ( <i>n</i> ) |                            | Coef.  | <i>p</i> -value   |
|-------------------------------------------------------------|-----------------------------------------------|----------------------------|--------|-------------------|
|                                                             | Good PTN<br>( <i>n</i> =566)                  | Low PTN<br>( <i>n</i> =97) |        |                   |
| <i>Socio-demographic variables</i>                          |                                               |                            |        |                   |
| Age <sup>a</sup>                                            | 39.4 (11.1)                                   | 35.9 (10.7)                | -3.17  | 0.002             |
| Sex (male) <sup>b</sup>                                     | 67.5% (382)                                   | 77.3% (75)                 | 3.74   | 0.053             |
| Bachelor's degree ( <i>n</i> =659, Yes) <sup>b</sup>        | 50.8% (286)                                   | 36.5% (35)                 | 6.75   | 0.009             |
| <i>Addiction related factors</i>                            |                                               |                            |        |                   |
| Addiction criteria <sup>a</sup>                             | 8.7 (1.6)                                     | 8.3 (1.7)                  | -2.21  | 0.027             |
| Current use (days; <i>n</i> =642) <sup>a</sup>              | 21.2 (11.2)                                   | 19.8 (12.1)                | -1.07  | 0.284             |
| Duration of regular use (years; <i>n</i> =647) <sup>a</sup> | 15.7 (10.9)                                   | 13.5 (10.1)                | -1.78  | 0.076             |
| Population <sup>b</sup>                                     |                                               |                            | 204.91 | <b>&lt;.0001*</b> |
| Addictaqui                                                  | 95.8% (542)                                   | 45.4% (44)                 |        |                   |
| Cosinus                                                     | 4.2% (24)                                     | 54.6% (53)                 |        |                   |
| Main addiction <sup>b</sup>                                 |                                               |                            | 20.99  | <b>&lt;.001*</b>  |
| Alcohol                                                     | 44.7% (253) <sup>#</sup>                      | 30.9% (30)                 |        |                   |
| Cannabis                                                    | 16.3% (92)                                    | 17.5% (17)                 |        |                   |
| Opiates                                                     | 13.4% (76)                                    | 30.9% (30) <sup>#</sup>    |        |                   |
| Stimulants                                                  | 9.2% (52)                                     | 9.3% (9)                   |        |                   |
| Tobacco                                                     | 16.4% (93) <sup>#</sup>                       | 11.3% (11)                 |        |                   |
| <i>Other factors</i>                                        |                                               |                            |        |                   |
| Current poly-addiction (Yes) <sup>b</sup>                   | 79.3% (449)                                   | 89.7% (87)                 | 5.74   | 0.017             |

Notes: Number of subjects (*n*) is precise when data are missing when it is not  $n=663$ . Legends: a. mean (*SD*) Wilcoxon test (*z*); b. % (*n*)  $\chi^2$  of Pearson; #: main addiction significantly different (post-hoc comparisons,  $p < 0.05$ ). Addiction related factors are described only for the main addiction. Significant comparisons after Bonferroni corrections were marked using standard representation: \*; significance level:  $p < 0.0009$ .

**Supplementary Table 2.** Univariate analyses between PTN and craving by main addiction.

|                          | Craving       |       |                 |                |       |                 |                   |       |                 |
|--------------------------|---------------|-------|-----------------|----------------|-------|-----------------|-------------------|-------|-----------------|
|                          | Frequency     |       |                 | Mean intensity |       |                 | Maximal intensity |       |                 |
|                          | Mean<br>(SD)  | Coef. | <i>p</i> -value | Mean<br>(SD)   | Coef. | <i>p</i> -value | Mean<br>(SD)      | Coef. | <i>p</i> -value |
| <b><i>Alcohol</i></b>    | <i>n</i> =280 | -4.55 | <.0001*         | <i>n</i> =282  | -3.25 | 0.001           | <i>n</i> =283     | -4.73 | <.0001*         |
| Low PTN                  | 6.7 (11.9)    |       |                 | 3.3 (3.9)      |       |                 | 4.0 (4.2)         |       |                 |
| Good PTN                 | 16.8 (12.1)   |       |                 | 5.9 (3.2)      |       |                 | 7.6 (3.5)         |       |                 |
| <b><i>Stimulants</i></b> | <i>n</i> =61  | -1.84 | 0.065           | <i>n</i> =61   | -2.20 | 0.027           | <i>n</i> =61      | -2.86 | 0.004           |
| Low PTN                  | 12.2 (12.2)   |       |                 | 4.2 (3.0)      |       |                 | 5.7 (3.7)         |       |                 |
| Good PTN                 | 20.3 (11.4)   |       |                 | 6.7 (2.9)      |       |                 | 8.4 (3.0)         |       |                 |
| <b><i>Tobacco</i></b>    | <i>n</i> =104 | -2.40 | 0.017           | <i>n</i> =103  | -0.42 | 0.674           | <i>n</i> =104     | -1.91 | 0.056           |
| Low PTN                  | 12.1 (14.3)   |       |                 | 5.5 (4.1)      |       |                 | 6.0 (4.1)         |       |                 |
| Good PTN                 | 22.5 (11.8)   |       |                 | 6.5 (2.9)      |       |                 | 7.9 (3.0)         |       |                 |
| <b><i>Opiates</i></b>    | <i>n</i> =105 | -3.44 | <.001*          | <i>n</i> =105  | -2.12 | 0.034           | <i>n</i> =105     | -1.74 | 0.082           |
| Low PTN                  | 7.6 (11.4)    |       |                 | 3.4 (4.0)      |       |                 | 4.6 (4.9)         |       |                 |
| Good PTN                 | 17.4 (13.4)   |       |                 | 5.3 (3.5)      |       |                 | 6.8 (3.9)         |       |                 |
| <b><i>Cannabis</i></b>   | <i>n</i> =109 | -2.43 | 0.015           | <i>n</i> =109  | -2.36 | 0.019           | <i>n</i> =109     | -1.92 | 0.055           |
| Low PTN                  | 12.8 (13.1)   |       |                 | 4.5 (2.9)      |       |                 | 6.4 (3.5)         |       |                 |
| Good PTN                 | 20.2 (11.6)   |       |                 | 6.1 (2.3)      |       |                 | 8.0 (2.6)         |       |                 |

Notes: All analyses are Wilcoxon test (*z*). Significant comparisons after Bonferroni corrections were marked using standard representation: \*; significance level: *p* < 0.0009.
